## Research Article

# Remodeling hydrogen bond interactions results in relaxed specificity of Caspase-3

Liqi Yao<sup>1</sup>, Paul Swartz<sup>2</sup>, Paul T. Hamilton<sup>3</sup> and  A. Clay Clark<sup>1</sup><sup>1</sup>Department of Biology, University of Texas at Arlington, Arlington, TX 76019, U.S.A.; <sup>2</sup>Department of Molecular and Structural Biochemistry, NC State University, Raleigh, NC 27608, U.S.A.; <sup>3</sup>Department of Plant and Microbial Biology, North Carolina State University, Raleigh, NC 27695, U.S.A**Correspondence:** A. Clay Clark (clay.clark@uta.edu)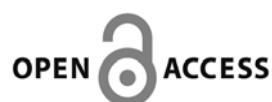

Caspase (or cysteinyl-aspartate specific proteases) enzymes play important roles in apoptosis and inflammation, and the non-identical but overlapping specificity profiles (that is, cleavage recognition sequence) direct cells to different fates. Although all caspases prefer aspartate at the P1 position of the substrate, the caspase-6 subfamily shows preference for valine at the P4 position, while caspase-3 shows preference for aspartate. In comparison with human caspases, caspase-3a from zebrafish has relaxed specificity and demonstrates equal selection for either valine or aspartate at the P4 position. In the context of the caspase-3 conformational landscape, we show that changes in hydrogen bonding near the S3 subsite affect selection of the P4 amino acid. Swapping specificity with caspase-6 requires accessing new conformational space, where each landscape results in optimal binding of DxxD (caspase-3) or VxxD (caspase-6) substrate and simultaneously disfavors binding of the other substrate. Within the context of the caspase-3 conformational landscape, substitutions near the active site result in nearly equal activity against DxxD and VxxD by disrupting a hydrogen bonding network in the substrate binding pocket. The converse substitutions in zebrafish caspase-3a result in increased selection for P4 aspartate over valine. Overall, the data show that the shift in specificity that results in a dual function protease, as in zebrafish caspase-3a, requires fewer amino acid substitutions compared with those required to access new conformational space for swapping substrate specificity, such as between caspases-3 and -6.

## Introduction

Caspases, or cysteinyl-aspartate specific proteases, are important for apoptosis and cell differentiation [1], but the threshold of activity that results in differentiation or apoptosis is still unknown. The complex signaling pathways of eumetazoans utilize multiple caspases in three subfamilies, two of which are involved in cell death, and the third subfamily is involved in inflammation [2,3]. Caspases recognize a tetrapeptide sequence, with the exception of caspase-2 which prefers a pentapeptide sequence [2,4], and all caspases prefer aspartate at the P1 position of the substrate. The P2 amino acid is generally hydrophobic, and the P3 amino acid is generally acidic and binds on the surface of the active site. Caspase specificity is defined primarily by the amino acid in the P4 position, such that caspases can be further classified into three groups based on their substrate preferences (Figure 1A): Group I, including caspase-1, -4, and -5, prefers the tetrapeptide sequence WEHD. Group II, including caspases-3 and -7, prefers DExD. Group III, including caspases-6, and -8, shows preferences for (I/L/V)ExD (x represents a non-specific amino acid) [5]. Although the structures of all caspases are nearly identical, it is not clear which amino acid substitutions among homologs result in selection of the P4 amino acid [6]. What may seem to be subtle differences in enzyme activity result in non-identical, yet overlapping, substrate specificities in the cell [7], so the selection of the P4 amino acid is important in cellular function.

Received: 05 October 2020  
Revised: 04 January 2021  
Accepted: 08 January 2021Accepted Manuscript online:  
15 January 2021  
Version of Record published:  
29 January 2021

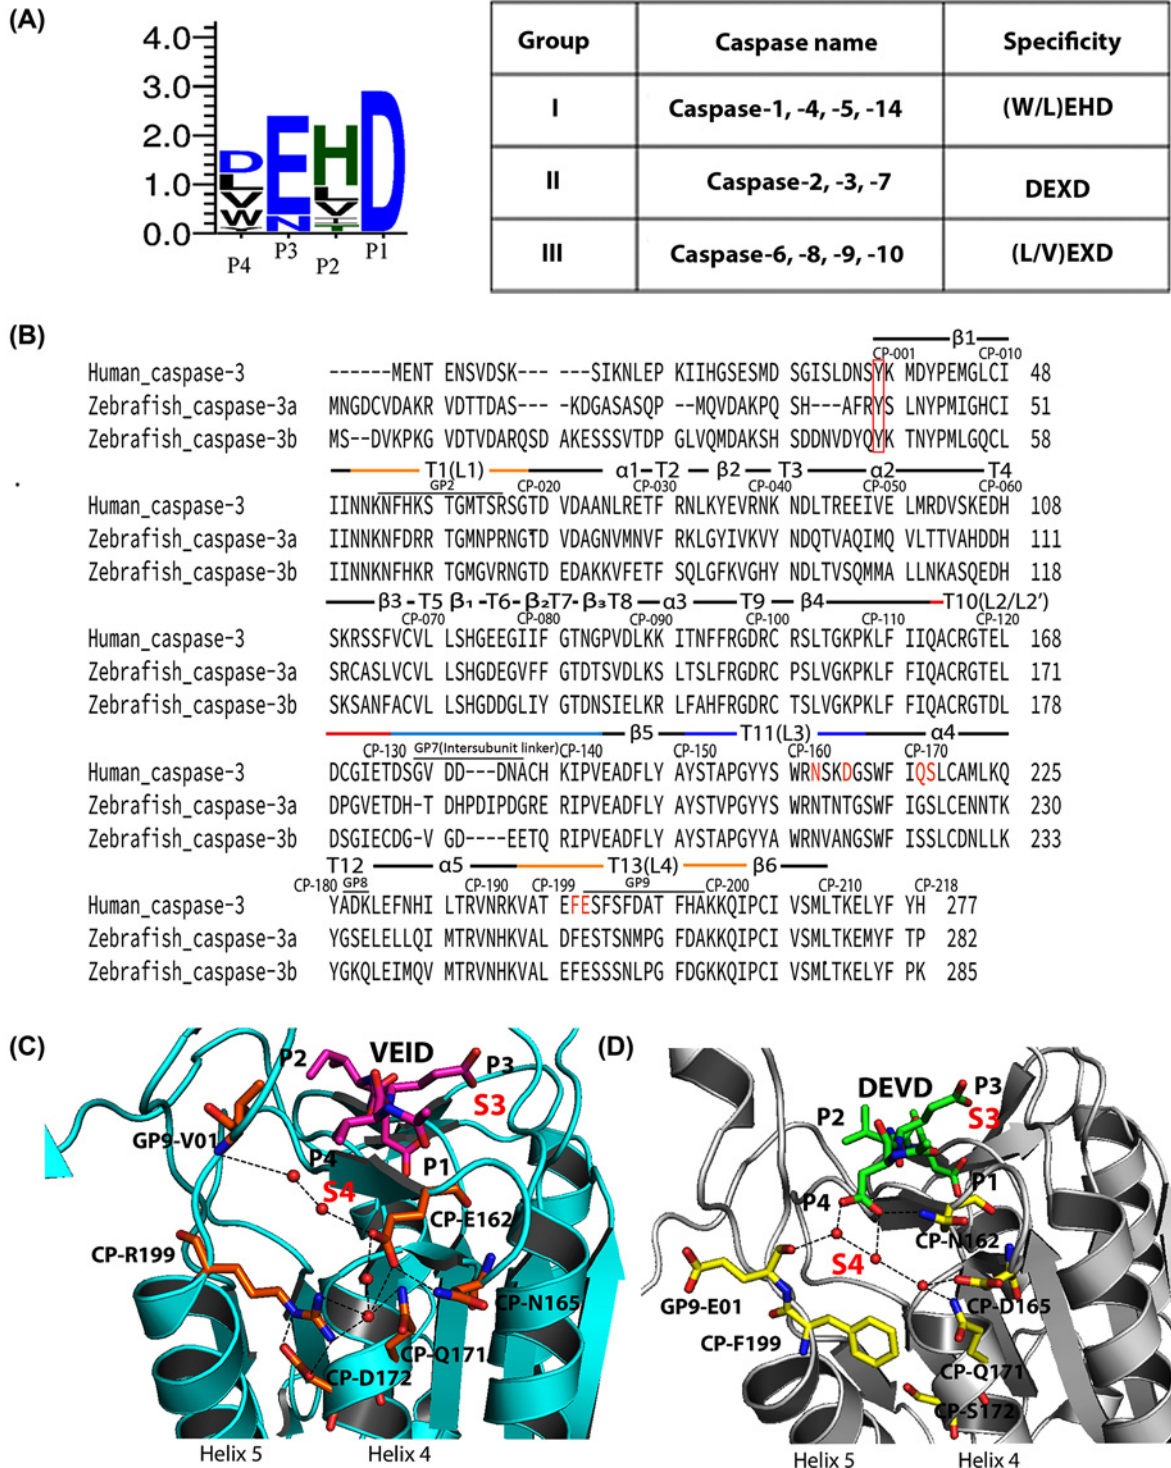

**Figure 1. Properties of caspases**

(A) Combined sequence logo for substrate preferences in caspases (left) and substrate preferences for Group I-III caspases (right). (B) Comparison of sequences for HsCasp-3, DrCasp-3a and DrCasp-3b. Common position numbering scheme and secondary structural elements are shown above each line, and actual position numbers are shown at the end of each row. Amino acids marked in orange show the charged amino acids in panel (D). Panels (C,D). The charged amino acid network in HsCasp-6 (PDB ID 3S70) (C) is incomplete in HsCasp-3 (PDB ID 2J30) (D). The red box indicates the start of the common position (CP) sites. In panels (C,D), red spheres represent water molecules, and black dashed lines represent hydrogen bonds. Inhibitors are shown as purple (VEID, panel (C)) or green (DEVD, panel (D)). Residues corresponding to P4, P3, P2 and P1 of the inhibitor are labeled, and the corresponding binding pockets for P4 (called S4) and for P3 (called S3) are labeled in red.

Zebrafish (*Danio rerio*) caspases are excellent models for the study of protein evolution and enzyme specificity because zebrafish have 19 different caspase genes as a result of whole-genome duplication [8]. Zebrafish have two copies of the caspase-3 gene, called DrCasp-3a and DrCasp-3b (Figure 1B). DrCasp-3a is expressed mainly in the brain and retina, while DrCasp-3b is expressed ubiquitously [8]. In humans, HsCasp-3 is a DxxDase and acts as the primary executioner in apoptosis. It is expressed ubiquitously, while human caspase-6, a VxxDase, is expressed mainly in the brain or nervous system and controls cell development and differentiation [9]. The localization of DrCasp3a and of DrCasp3b suggests that DrCasp-3a may be more similar to HsCasp-6 than to HsCasp-3, at least in terms of function during cell development. In support of this hypothesis, we showed previously that DrCasp-3a demonstrates equal activity against substrates with valine or aspartate at the P4 position [10].

Caspase subfamilies evolved from a common ancestor that diverged into multiple caspases more than 700 million years ago [11]. We showed recently that the common ancestor of effector caspases-3, -6, and -7 was a promiscuous enzyme with little preference for aspartate or valine at the P4 site [12]. In addition, specificity for valine evolved early in the caspase-6 lineage due to introduction of a network of charged amino acids near the S4 subsite (Figure 1C). The network results in a more hydrophobic S4 pocket by moving charged amino acids away from the pocket. It is not yet clear, however, how selection of aspartate evolved in the caspases-3, -7 lineages. The caspases-3, -7 proteins lack the charged amino acid network observed in caspase-6, which generally results in a more hydrophilic S4 pocket and hydrogen bonding interactions with the carboxylate at P4 (Figure 1D). In comparison, DrCasp-3a is similar in structure to HsCasp-3, in that it lacks the charged amino acid network observed in caspase-6 [10]. Thus, the data suggest that within the framework of the caspase-3 conformational landscape, amino acid substitutions outside of the S4 subsite result in relaxed specificity of DrCasp-3a. Analysis of duplicated genes may show how genes diverged within the same genetic background, and in particular, how evolutionary changes in the caspase-3 conformational landscape affect enzyme selectivity.

Based on a comparison of HsCasp-3 and DrCasp-3a structures [10,13], we generated a series of mutants to examine active site residues that affect substrate selection. We show that improving specificity for a P4 residue correlates to improved  $K_M$ . For caspases, the  $K_M$  is thought to closely estimate  $K_D$ , so the data suggest that selection correlates with improved binding of the P4 residue [2]. For DrCasp-3a, with relaxed specificity, two amino acid substitutions near the S3 subsite shifted selection toward aspartate over valine, resulting from improved hydrogen bonding with the P3 residue. The converse substitutions in HsCasp-3 resulted in relaxed specificity and nearly equal activity against VxxD and DxxD. Thus, improved hydrogen bonding in the S3 subsite favors binding of aspartate in the S4 subsite while simultaneously disfavoring binding of the hydrophobic valine in the S4 subsite.

## Materials and methods

### Cloning, expression, and purification

Zebrafish caspase-3a CP-N163T and CP-N163V were made by PCR site-directed mutagenesis and were cloned into pET11a expression plasmid containing either wild-type caspase-3 or zebrafish caspase-3a with a C-terminal histidine tag, as described previously [10,14]. The remaining mutants were made by GenScript. Mutations were confirmed by Sanger sequencing of both DNA strands. Plasmids were transformed into *Escherichia coli* BL21 (DE3) pLysS, and proteins were expressed as described [14,15].

Caspase-3, -6, and -7 sequences in all species were downloaded from the CaspBase [16]. A multiple sequence alignment (MSA) was generated for each subfamily by analyzing the amino acid frequency at each position with ProtParam on the ExpAsy server [17]. Sequence logos were generated utilizing the web-logo server [18].

### Enzyme activity assays

The enzymatic activity of the caspases were measured at 25°C in a buffer of pH 7.5, 150 mM Tris, 50 mM NaCl, 0.1% sucrose, 0.1% CHAPS and 10 mM DTT, as described previously [19]. Briefly, the total reaction volume was 200 µl, with a final enzyme concentration of 10 nM. The concentration of substrates Ac-DEVD-AFC or Ac-VEID-AFC was varied, as described previously [20]. Samples were excited at 400 nm, and the emission was monitored at 505 nm for 60 s. The steady-state parameters,  $K_M$  and  $k_{cat}$ , were determined from plots of initial velocity *versus* substrate concentration. The experiments were repeated three times, and the error bars in the figure show the standard deviation.

### Phage display substrate libraries and selection

Caspase substrate libraries were constructed with an amino-terminal hexa-histidine sequence rendering the phage capable of binding to HisPur Ni-NTA resin, and caspase selection was determined as described previously [10]. Briefly, phage libraries consisting of caspase cleavage sequences were bound to Ni-NTA resin, and the column was washed



with a buffer of 50 mM Imidazole, 1 M NaCl, 1× PBS, and 0.1% Tween-80 to remove unbound phage. Caspase enzyme (10–100 nM) was added to initiate the reaction, and samples were incubated for 3 h. Phage possessing a suitable caspase cleavage site were released into the solution supernatant, and were amplified in *E. coli* ER2738 cells. The resulting phage was used for the following round of selection. Substrate sequences were determined after three to five rounds of selection, and the endpoint of the experiment was determined by plaque counting, where the number of phage bound to the resin was similar to the number of phage released during the treatment. The data showed no difference between the third, fourth, and fifth rounds, so data were combined.

## Crystallization data collection and molecular dynamics simulations

DrCasp-3a(CP-N163T) was crystallized as described previously for HsCasp-3 [20]. Briefly, protein was dialyzed in a buffer of 10 mM Tris/HCl, pH 8.5, 1 mM DTT, concentrated to 4 mg/ml, and inhibitor Ac-DEVD-CHO (reconstituted in DMSO) was added at a 5:1 (w/w) inhibitor/protein ratio. Crystals were obtained at 18°C by the hanging-drop vapor diffusion method using a 4- $\mu$ l drop that contained equal amounts of protein and reservoir solution. Each well contained a reservoir solution (500  $\mu$ l) of 100 mM sodium citrate, pH 5.4, 23% PEG 6000, 10 mM DTT, and 3 mM NaN<sub>3</sub>. Flat, sheet-like crystals appeared within 14 days, and we used microseeding to obtain diffraction-quality crystals. In this case, crystal trays were set up as described above and incubated for 24 h. The flat sheet crystals were collected and treated with seed beads using a kit from Hampton Research. Briefly, a 4- $\mu$ l drop containing flat sheet crystals was added to a tube containing seed beads, following the manufacturer's instructions. Reservoir solution (10  $\mu$ l) was pipetted on the cover slide to remove all crystals from the coverslip, and the procedure was repeated five times. The resulting mixture of crystals and seed beads was vortexed for 30 s and cooled on ice for 10 s, and the procedure was repeated six times. Serial dilutions of the treated crystals were set up from 10<sup>-1</sup> to 10<sup>-3</sup>, and 0.5  $\mu$ l of the 10<sup>-2</sup> dilution crystal seeds was added into the drops of the 24-h crystal tray. Larger cube-shaped crystals appeared within 14 days. The crystals were collected and frozen in liquid nitrogen following the addition of 20% MPD (2-methylpentane-2,4-diol) plus the reservoir solution. Data were collected at 100 K at the SER-CAT synchrotron beamline (Advance Photon Source, Argonne National Laboratory Argonne, IL, U.S.A). The dataset contained 180 frames at 1° rotation. The protein crystallized in the orthorhombic space group P2<sub>1</sub>2<sub>1</sub> and was phased with a previously published DrCasp-3a (PDB ID: 5JFT). Data reduction and model refinements were done using HKL2000, COOT, and Phenix [21,22,23].

Molecular dynamics (MD) simulations were performed using GROMACS 2016, as described previously [24,25,26,27]. Simulations used the Amber99 force field and the TIP3P water model. Simulations started with the structure from wild-type DrCasp-3a [10], and mutations were added using Pymol. The proteins were solvated in a periodic box of 62 × 48 × 66 Å, with ~14000 water molecules, as described for HsCasp3a [28]. Sodium or chloride atoms were added to neutralize the charge on the system. Steepest descent was used to minimize the system, and the waters were then relaxed during a 20 ps MD simulation with positional restraints on the protein. Simulations (50 ns) were then run under constant temperature (300 K) and pressure, and a time step of 2 fs used. Coordinates were saved every 5 ps, and the protein was equilibrated within 500 ps.

## Results and discussion

### Comparing caspases from human and zebrafish suggest sites that affect specificity

We previously developed the common position (CP) numbering scheme in order to describe amino acid positions in caspases from multiple species [16]. In the CP system, the amino acid positions that are common for each caspase are preceded by 'CP-', while regions that diverge are preceded by 'GP-'. The GP, or gap regions, generally vary in number of amino acids and typically comprise loops near the active site or the intersubunit linker. The CP numbering for DrCasp-3a and HsCasp-3 is shown in Figure 1B. Here we refer to the CP for consistency, but we provide the actual position number as well.

We used data from the CaspBase [16] and compared sequences and structures of caspases-3, -6, and -7, that is, the effector caspase subfamily. First, the analysis showed that the charged network in caspase-6, resulting in selection of P4 valine, is incomplete in caspases-3 and -7. While CP-E162 in caspase-6 is moved away from the S4 binding pocket due to the charged network, CP-N162 in caspase-3 forms a hydrogen bond with the carboxylate of the P4 aspartate (Figure 2A). In addition, conservation maps of amino acids between caspases-3 and -6 from mammals (Figure 2B) and between caspases-3 from mammals *versus* fish (Figure 2C) show similar patterns. That is, the core of the proteins as well as the active sites are reasonably well-conserved compared with the surface helices, which show much lower conservation. As we and others showed previously, the helices are part of allosteric networks which may be fine-tuned for species-specific function [20,29,30]. Thus, the lower conservation in the helices may reflect

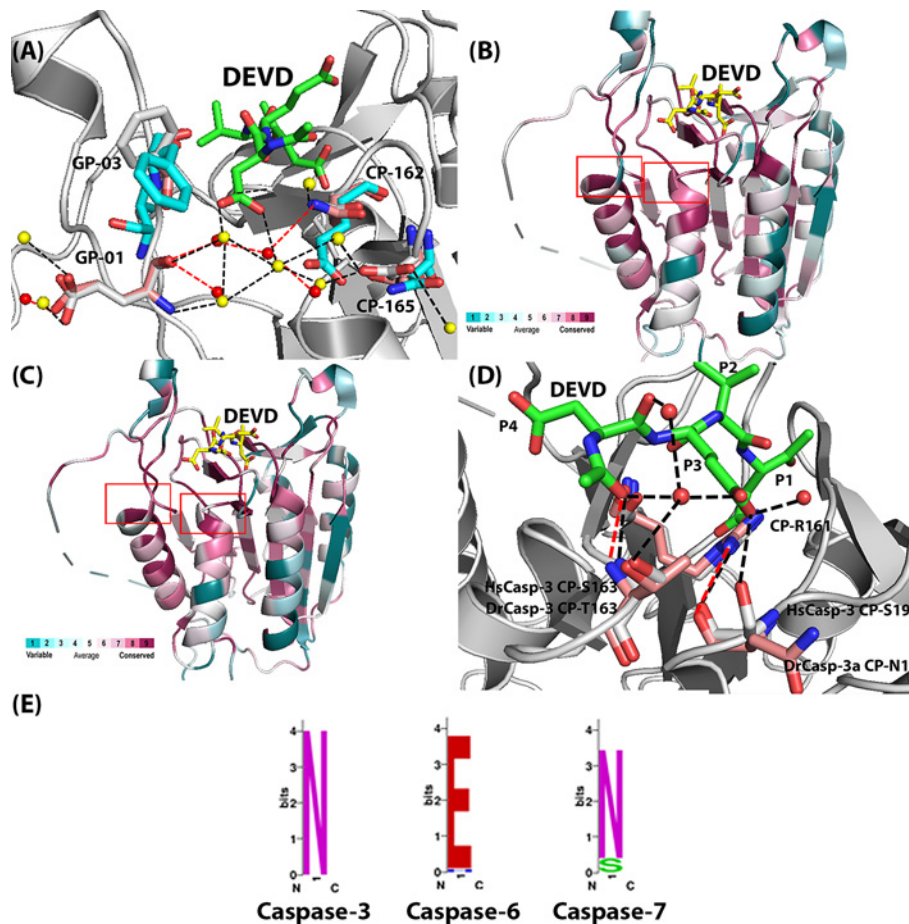

**Figure 2. Comparison of human zebrafish caspases**

(A) Comparison of HsCasp-3 (gray), DrCasp-3a (salmon) and HsCasp-6 (cyan), showing CP-N162, CP-D165 and GP9-E01. The yellow spheres present the water molecules in HsCasp-3. The red spheres present water molecules in DrCasp-3a. The black dashed lines represent hydrogen bonds in HsCasp-3, while the red dashed lines represent hydrogen bonds in DrCasp-3a. (B) Conservation map of comparison between caspase-3 and caspase-6 from mammals. Red boxes show differences in conservation of the active site region shown in Panel (A). (C) Conservation map of comparison between caspase-3 from mammals and from fish. Red boxes show differences in conservation of the active site region shown in Panel (D). For panels (B,C), sites with higher conservation are shown in red, and less conserved sites are shown in cyan. A heat map describing the color scheme is shown in each panel. Conservation maps were determined using the ConSurf server [31–33]. (D) Comparison of HsCasp-3 (gray) and DrCasp-3a (salmon), showing CP-19, CP-212, and CP-163. Red spheres represent water molecules, and black dashed lines represent hydrogen bonds in HsCasp-3. (E) Amino acids utilized at CP-162, based on multiple sequence alignments of caspase-3, -6, and -7 from 200 species. Asparagine is conserved in caspase-3 and -7, while glutamate is conserved in the caspase-6 lineage.

increased evolutionary pressure on allosteric regulation of the enzyme, compared with the more conserved active site. More specifically, however, the comparison of the caspase-3, -6, -7 subfamily showed several amino acids in the active site with low conservation, even though the active site overall is more conserved. The amino acids are listed in Table 1 and include the charged amino acid network near the S4 binding pocket, described above, as well as two amino acids that are near a highly conserved arginine (CP-R161) that forms several hydrogen bonds with the P1 and P3 amino acids of the substrate (Figure 2D).

To determine the role, if any, of the amino acids listed in Table 1 in substrate selection, we first examined amino acids in or near the S4 subsite. As described previously [16], CP162 is conserved in caspase-6 (VxxDases) as glutamate (Figure 1B,C and Figure 2E). In contrast, CP162 is conserved in caspases-3 and -7 (DxxDases) as asparagine (Figure 1B,D and Figure 2E). Reconstructions of ancestral effector caspases showed that the polar glutamate in the caspase-6 lineage is moved away from the S4 subsite by hydrogen bonding to a network of amino acids on helices-4 and -5, as described above [12]. The interactions result in rotation of a hydrophobic group on active site loop 4 (L4), called

**Table 1 Comparison of amino acid positions that may affect specificity among human caspase-3, DrCasp-3a, and DrCasp-3b**

| CP     | AA in HsCasp-3 | AA in DrCasp-3a | AA in DrCasp-3b | AA in HsCasp-6 | Comments                                                                                                |
|--------|----------------|-----------------|-----------------|----------------|---------------------------------------------------------------------------------------------------------|
| CP-19  | S65            | N68             | N75             | R65            | Hydrogen bonds with P3 amino acid, involved in substrate binding in P3 position                         |
| CP-162 | N208           | N213            | N216            | E221           | Hydrogen bonds with P4 aspartate residue, involved in substrate binding in P4 position                  |
| CP-163 | S209           | T214            | V217            | T222           | Hydrogen bonds with P4 aspartate residue                                                                |
| CP-165 | D211           | T216            | N219            | N224           | Hydrogen bonds with water network to P4 aspartate residue, involved in substrate binding in P4 position |
| CP-172 | S218           | S223            | S226            | D231           | Hydrogen bonds between helix 4 and helix 5                                                              |
| CP-199 | F247           | F252            | F255            | R260           | Hydrogen bonds between helix 4 and helix 5                                                              |
| GP9-01 | E248           | E253            | E255            | V261           | Hydrogen bonds with water network to P4 aspartate residue, involved in substrate binding in P4 position |
| GP9-03 | F250           | T255            | S257            | F263           | Hydrogen bonds with water network to P4 aspartate residue, involved in substrate binding in P4 position |

**Table 2 Catalytic parameters for caspase-3 and all mutants**

|                                                       | DEVD-afc                     |            |                                                   | VEID-afc                     |            |                                                   |
|-------------------------------------------------------|------------------------------|------------|---------------------------------------------------|------------------------------|------------|---------------------------------------------------|
|                                                       | $k_{cat}$ (s <sup>-1</sup> ) | $K_M$ (μM) | $k_{cat}/K_M$ (M <sup>-1</sup> .s <sup>-1</sup> ) | $k_{cat}$ (s <sup>-1</sup> ) | $K_M$ (μM) | $k_{cat}/K_M$ (M <sup>-1</sup> .s <sup>-1</sup> ) |
| HsCasp-3                                              | 0.4 ± 0.05                   | 2.2 ± 0.5  | 1.1 × 10 <sup>5</sup>                             | NA                           | NA         | NA                                                |
| DrCasp-3a                                             | 7.5 ± 0.4                    | 22 ± 1     | 3.4 × 10 <sup>5</sup>                             | 2 ± 0.2                      | 42 ± 3     | 4.8 × 10 <sup>4</sup>                             |
| DrCasp-3b                                             | 2 ± 0.1                      | 21 ± 1     | 9.4 × 10 <sup>4</sup>                             | 1 ± 0.7                      | 381 ± 20   | 3.93 × 10 <sup>3</sup>                            |
| DrCasp-3a CP-N162V                                    | 9.0 ± 0.4                    | 27 ± 3     | 3.4 × 10 <sup>5</sup>                             | 1 ± 0.1                      | 42 ± 10    | 2.3 × 10 <sup>4</sup>                             |
| DrCasp-3a CP-N162T                                    | 0.5 ± 0.01                   | 14 ± 1     | 3.3 × 10 <sup>4</sup>                             | N.D. <sup>1</sup>            | N.D.       | N.D.                                              |
| DrCasp-3a CP-T163V                                    | 2.68 ± 0.3                   | 22 ± 1     | 1.2 × 10 <sup>5</sup>                             | 3 ± 2                        | 609 ± 417  | 1.2 × 10 <sup>3</sup>                             |
| DrCasp-3a CP-T198V                                    | N.D.                         | N.D.       | N.D.                                              | N.D.                         | N.D.       | N.D.                                              |
| HsCasp-3 CP-S19N                                      | 2.3 ± 0.3                    | 61 ± 14    | 3.7 × 10 <sup>4</sup>                             | N.D.                         | N.D.       | N.D.                                              |
| HsCasp-3 CP-S163T                                     | 4.0 ± 0.4                    | 91 ± 14    | 4.4 × 10 <sup>5</sup>                             | N.D.                         | N.D.       | N.D.                                              |
| HsCasp-3 CP-S19N CP-S163T                             | 2.3 ± 0.7                    | 31 ± 2     | 7.2 × 10 <sup>4</sup>                             | *                            | >900       | *                                                 |
| DrCasp-3a CP-N19S CP-T163S CP-T165D GP9-T03F          | 6.3 ± 0.2                    | 28 ± 2     | 2.2 × 10 <sup>5</sup>                             | N.D.                         | N.D.       | N.D.                                              |
| HsCasp-3 CP-S19N CP-S163T CP-D165T GP9-F03T           | 2.7 ± 0.1                    | 33 ± 4     | 8.2 × 10 <sup>4</sup>                             | 2 ± 0.1                      | 189 ± 19   | 2.3 × 10 <sup>4</sup>                             |
| HsCasp-3 CP-N162E CP-D165N GP9-F03T                   | 0.2 ± 0.2                    | 24 ± 5     | 8.3 × 10 <sup>4</sup>                             | N.D.                         | N.D.       | N.D.                                              |
| HsCasp-3 CP-N162T CP-D165T GP9-F03T                   | 1.4 ± 0.1                    | 54 ± 7     | 2.6 × 10 <sup>4</sup>                             | N.D.                         | N.D.       | N.D.                                              |
| HsCasp-3 CP-N162V CP-D165T GP9-F03T                   | 0.2 ± 0.1                    | 131 ± 21   | 1.45 × 10 <sup>3</sup>                            | N.D.                         | N.D.       | N.D.                                              |
| HsCasp-3 CP-N162E CP-D165N CP-S172D CP-F199R GP9-E01V | 11.9 ± 2.4                   | 231 ± 62   | 5.1 × 10 <sup>4</sup>                             | N.D.                         | N.D.       | N.D.                                              |

\*Neither  $k_{cat}$  nor  $k_{cat}/K_M$  can be accurately determined due to very high  $K_M$  values.

<sup>1</sup>N.D. – below the detection limit for the assay,  $\sim 10^2$  M<sup>-1</sup>.s<sup>-1</sup> for  $k_{cat}/K_M$ .

GP9-V01, into the S4 subsite (Figure 1C) [12]. The charged network on helices 4 and 5, observed in caspase-6, is incomplete in caspases-3 and -7, and the hydrophobic GP9-V01 is substituted with glutamate in the DxxDases (Figure 1D). Thus, within the framework of the conformational landscape for each caspase, the structural comparisons suggest that completing the charged amino acid network in helices 4 and 5, and substituting GP9-01E for valine, should shift specificity in caspase-3 toward P4 valine. To test the hypothesis, we introduced mutations in HsCasp-3 that would complete the charged network observed in caspase-6 (CP-N162E, CP-D165N, CP-S172D, CP-F199R, GP9-E01V; see Table 1). The data for the HsCasp-3 mutant, however, show that the mutant has a substantial increase in  $K_M$  for DEVD substrate and no activity toward VEID substrate (Table 2). In the context of the caspase-3 conformational landscape,

simply completing the charged network observed in caspase-6 is not sufficient to change enzyme specificity.

Since the caspase-3 and -7 subfamilies do not contain the charged amino acid network observed in caspase-6, other evolutionary changes must also affect substrate selection within the framework of the caspase-3 conformational landscape for DrCasp-3a to exhibit similar activity against P4 aspartate or valine. In comparison to HsCasp-3 and HsCasp-6, DrCasp-3a is more structurally similar to HsCasp-3 in that CP-N162 and GP9-E01 are conserved, and the charged/polar network on helices 4 and 5 is incomplete (Table 1 and Figures 1B and 2A). Thus, it is not clear how changes in the conformational landscape of the DxxDase result in relaxed specificity to allow binding of aspartate or valine in the S4 subsite. It is worth noting that the structural comparisons appear to contrast the expression profiles described above, which suggest that DrCasp-3a is more similar functionally to HsCasp-6. At present, the dearth of functional studies in zebrafish limits conclusions regarding the roles of DrCasp-3a and of DrCasp-3b in development.

The whole-genome duplication in teleost fish resulted in two copies of caspase-3 in zebrafish, called DrCasp-3a and DrCasp-3b [8]. Thus, one can examine the specificity change of the enzymes as they evolve together in the same organism. In the absence of structural data for DrCasp-3b, we generated a structural model based on our previous X-ray crystal structure of DrCasp-3a [10]. The two enzymes have 60.6% identity at the amino acid level, and the model shows a similar structure to DrCasp-3a. Importantly, the S4 binding pocket is essentially identical with that of DrCasp-3a, with CP-N162 and GP9-E01 being conserved, and the polar network on helices 4 and 5 is incomplete, as observed for the DxxDases. As described below, DrCasp-3b is most selective for P4 aspartate and shows much lower activity against P4 valine. In addition, conservation maps, described above, between caspases-3 and -6 from mammals (Figure 2B) and caspases-3 from mammals *versus* fish (Figure 2C) show similar patterns overall, but more specifically, HsCasp-3 and DrCasp-3a sequences show 80 substitutions between the two proteins (Figure 1B), with 8 substitutions near the active site. In comparison, there are 75 differences between DrCasp-3a and DrCasp-3b, with 6 substitutions near the S4 and S3 binding pockets. Based on comparisons of the three proteins, we examined substitutions at eight sites, as shown in Table 1, including the five amino acids described above that comprise the charged network from caspase-6. Our goal was to determine interactions that result in the relaxed specificity for DrCasp-3a and that, in turn, result in the selection of aspartate over valine in HsCasp-3.

We first examined changes at CP-N162 by mutating the residue to Val or Thr in DrCasp-3a or to Val, Thr, or Glu in HsCasp-3. As shown in Figure 1D, CP-N162 forms a hydrogen bond with the carboxylate of the P4 aspartate in caspase-3. In contrast, CP-E162 is moved away from the P4 valine in caspase-6 (Figure 1C). The longer side-chain of CP-E162, compared with CP-N162, allows for interactions with a network of charged amino acids that stabilize the position of the CP-E162 side-chain. In addition, the smaller side-chain of CP-T162 could potentially hydrogen bond with the carboxylate of the P4 aspartate, or it could increase hydrophobicity of the S4 binding pocket, depending on the orientation of the side-chain hydroxyl or methyl groups. The rationale for CP-T162 and CP-V162 was to determine whether increasing hydrophobicity in the S4 subsite would result in changes in substrate selection. The results show little change in DrCasp-3a with CP-N162 to Val substitution. Neither the  $K_M$  nor the  $k_{cat}$  are significantly changed compared with wild-type DrCasp3a (Table 2, Supplementary Figure S1). In contrast, the CP-N162 to Thr variant of DrCasp-3a demonstrated no activity against VEID substrate (Table 2 and Supplementary Figure S1). In addition, the activity of CP-N162T against DEVD was approximately ten-fold lower than that of the wild-type enzyme, due primarily to a decrease in  $k_{cat}$  (Table 2). We determined the X-ray crystal structure of DrCasp-3a(CP-N162T) variant at 2.7 Å resolution, and the data showed little to no change in the active site (Supplementary Figure S2). The hydroxyl group of the Thr side-chain forms a hydrogen bond with its backbone amide group, which presumably stabilizes the turn in active site loop 3 (called L3). The methyl group of the Thr side-chain is oriented toward the acetyl group of the substrate, while the P4 aspartate forms three hydrogen bonds with groups in the L3 and L4 loops. Thus, it is not clear from the structure why this variant has no activity against VEID substrate and a lower catalytic efficiency against DEVD substrate.

In HsCasp-3, we examined CP-N162 in the context of two additional sites (CP-D165 and GP9-F03). The latter two sites are either part of the charged network described above (CP-D165, in active site loop 3) or form a hydrophobic cluster on the surface of active site loop 4 (GP9-F03) (see Figure 2A). The substitution of CP-N162 for glutamate had little effect on activity against DEVD substrate, but substitutions of CP-N162 for threonine or valine had much larger effects, between 5- and 100-fold decreases in activity against DEVD substrate. Regardless of the substitution, however, the HsCasp-3 CP-N162 variants demonstrated no increase in activity against VEID (Table 2). Together, the structural models and activity data for the S4 subsite variants show that selection of valine or aspartate in the P4 position is affected by factors outside of the S4 subsite. That is, simply changing the hydrophobicity of the S4 subsite was not sufficient to change substrate selectivity. Overall, we interpret the results to show that, in the absence of other changes in the active site, the loss of the hydrogen bond between the P4 aspartate and CP-N162, the hydrophobic cluster on the surface of loop L4, and the hydrogen bonds contributed by CP-D165 are not critical factors for determining selectivity.



Notably, the substitutions generally lower the activity against DEVD substrate without a concomitant increase in activity against VEID.

We next examined two sites away from the S4 subsite (CP-19 and CP-163) due to differences among HsCasp-3, DrCasp-3a, and DrCasp-3b (Table 1 and Figure 2). In HsCasp-3, the side-chain of CP-S19 contributes to a hydrogen bonding network between several water molecules and the universally conserved CP-R161 (Figure 2D). The side-chain of CP-R161 is critical for substrate binding because it forms hydrogen bonds with the P3 and P1 side-chains as well as several residues in active site loops 1 and 3 (Figure 2D). In addition, several water molecules contribute to the hydrogen bonding network that coordinates the P1 and P3 residues of the substrate (Figure 2D). In DrCasp-3a and DrCasp-3b, CP-S19 is substituted with asparagine (Table 1 and Figure 2D). Although CP-S19 directly hydrogen bonds to the P3 glutamate in HsCasp-3, the side-chain of CP-N19 is rotated toward solvent in DrCasp3a. A water molecule occupies the position of the hydroxyl group found in HsCasp-3, and the hydrogen bonding network is maintained through the water molecule and the backbone carbonyl of CP-N19 (Figure 2D). In contrast with CP-S/N19, the three proteins differ in the amino acid at CP-163, where HsCasp-3, DrCasp-3a, and DrCasp-3b utilize serine, threonine, or valine, respectively (Table 1). In HsCasp-3 and in DrCasp-3a, the hydroxyl group of the side-chain forms part of a water-mediated hydrogen bond with the P3 glutamate. In HsCasp-3, we first introduced substitutions of CP-S19N and CP-S163T in the context of the CP-D165T and GP9-F03T mutations described above. We also introduced comparable substitutions in DrCasp-3a (CP-N19S, CP-T163S, CP-T165D, GP9-T03F) (Table 2). The HsCasp-3 variant showed activity against DEVD similar to that of wild-type HsCasp-3, with  $k_{\text{cat}}/K_{\text{M}}$  values of  $8.2 \times 10^4$  and  $1.1 \times 10^5 \text{ M}^{-1} \cdot \text{s}^{-1}$ , respectively, so the mutations had little effect on the DxxDase activity. However, the HsCasp-3 variant also demonstrated activity against VEID, albeit with  $K_{\text{M}}$  values approximately five-fold higher than that of the wild-type DrCasp-3a (Table 2). Similarly, the DrCasp-3a variant that contained the comparable substitutions from HsCasp-3 showed high activity against DEVD, but little to no activity against VEID (Table 2 and Supplementary Figure S1). Based on our results described above for positions CP-D165 and GP9-F03, which demonstrated no change in substrate selection when combined with mutations at CP-N162, we reasoned that the results observed for mutants containing the four substitutions were due to the changes at CP-S19 or CP-S163, or both. We introduced single substitutions in HsCasp-3 to mimic DrCasp3a (CP-S19N, CP-S163T), and we also substituted both sites together in HsCasp-3. Both single variants showed activity against DEVD substrate, albeit with higher  $K_{\text{M}}$  values, and no activity against VEID substrate (Table 2 and Supplementary Figure S1). The double mutant also retained high activity against DEVD substrate, and there was observable activity against VEID substrate. However, a very high  $K_{\text{M}}$  for VEID prevented an accurate determination of  $k_{\text{cat}}$  as well as the specificity constant,  $k_{\text{cat}}/K_{\text{M}}$  (Table 2).

We confirmed the changes in substrate selection for the caspase-3 variants using phage-display substrate assays (Supplementary Figure S3). In those assays, immobilized substrate phage libraries randomized from P5-P1', or fixed with aspartate at P1, are cleaved with caspase variants, and the preferred sequences are determined after several rounds of selection and amplification [10]. Whereas wild-type DrCasp-3a shows selection for valine or aspartate at P4, wild-type HsCasp-3 demonstrates selection for aspartate but not valine [10]. Our results also show that DrCasp-3b exhibits a preference for P4 aspartate (Supplementary Figure S3A), which is consistent with peptide substrate studies (Table 2). In contrast with DrCasp-3a, which exhibits high activity against VEID substrate, DrCasp-3b shows very low activity against P4 valine (Table 2). In this case, the  $K_{\text{M}}$  for VEID substrate is approximately ten-fold higher in DrCasp-3b compared to DrCasp3a. In addition, the HsCasp-3 variants that included substitutions at CP-S19 and CP-S163 exhibit lower selection for P4 aspartate and increased selection for valine, serine, or threonine at P4 (Supplementary Figure S3). Together, the data show that substitutions near the S1 and S3 pockets, CP-19 and CP-163, when combined with substitutions near the S4 subsite, CP-165 and GP9-03, result in relaxed specificity for HsCasp-3 as well as increased selection for P4 aspartate in DrCasp-3a.

We examined the effects of the substitutions at CP-19 and CP-163 by MD simulations (50 ns) in order to examine changes in mobility of the active site (Figure 3, Supplementary Figure S4). The results show that the mutations had little effect on DEVD substrate bound in the active site (Figure 3A, Supplementary Figure S4). In the case of VEID substrate, however, the peptide at the P1 and P2 positions was released from the binding pocket (Figure 3B, Supplementary Figure S4). The data show that in wild-type DrCasp-3a, the mobility of CP-R161 is restrained due to the hydrogen bonding network with CP-N19, CP-T163, and the network of water molecules (Figure 3A,C, Supplementary Figure S4). This is true regardless of DEVD or VEID substrate bound in the active site. In contrast, substitutions at CP-19 and CP-163 resulted in increased mobility of CP-R161 with VEID substrate, but not DEVD substrate, bound in the active site (Figure 3D, Supplementary Figure S4). In the case of the VEID substrate, the increased mobility of CP-R161 resulted in clashes with the peptide backbone near the P2 residue. The clashes likely result in increased mobility of the peptide at the P1 and P2 sites. We suggest that with DEVD bound, the increase in hydrogen bonding with the P4 aspartate provides sufficient stability to prevent the increased movement of CP-R161 in the active site. In



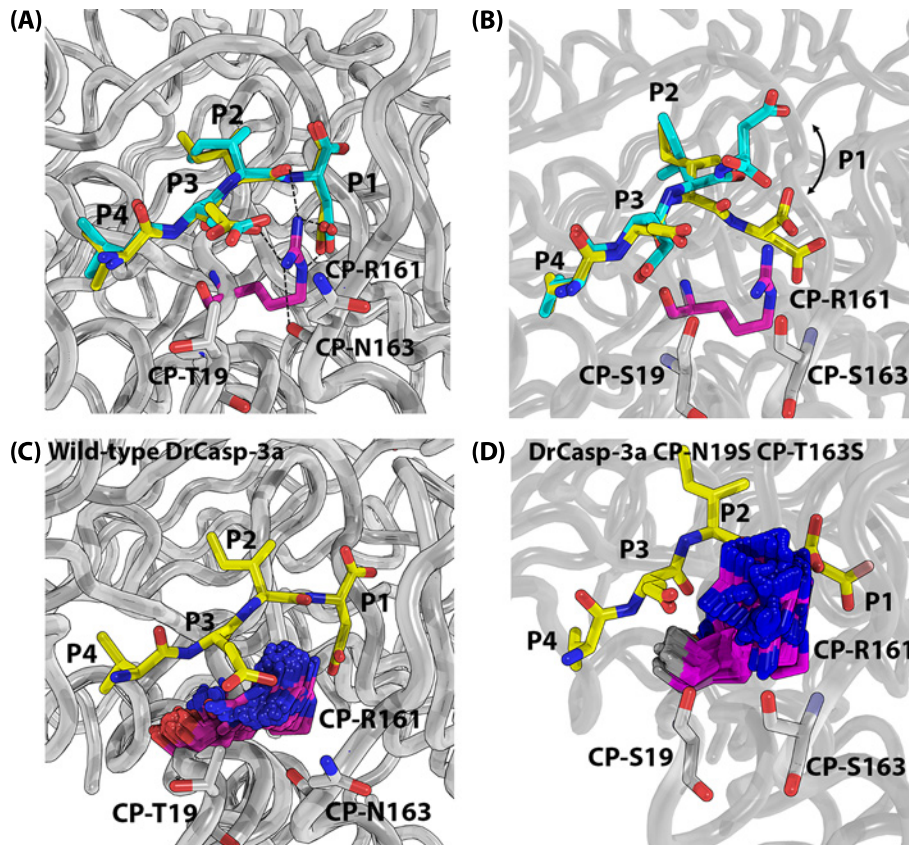

**Figure 3. MD simulations for CP-19S/N and CP-163S/T**

(A) Wild-type DrCasp-3a with VEID bound at time zero (yellow) and at 17 ns (cyan). Black dash line indicates hydrogen bonds. (B) DrCasp3a (CP-N19S, CP-T163S) variant with VEID bound at time zero (yellow) and at 17 ns (cyan). Panels (C,D) Comparison of mobility in CP-R161 in wild-type (panel C) versus CP-N19S, CP-T163S mutant of DrCasp3a. In both panels (C,D), the position of VEID substrate is shown at the beginning of the simulation, and the position of CP-R161 is shown every 0.25 ns over the course of the 50 ns simulation.

contrast, the binding of valine in the S4 subsite, and lack of hydrogen bonding with the side-chain, is insufficient to prevent mobility of CP-R161 and subsequent steric clashes with the bound substrate.

## Conclusions

We have shown that hydrogen bonding is an important determinant for selection of the P4 residue of caspase substrates and that interactions outside of the S4 binding pocket contribute to the selection of the P4 residue. In the conformational landscape of caspase-6, a network of charged or polar amino acids moves CP-E162 away from the S4 pocket, and rotation of GP9-V01 into the pocket increases hydrophobicity and thus preference for P4 valine in the substrate [12]. In the context of the caspase-3 conformational landscape, however, nature did not use this strategy to change selection toward P4 aspartate. In contrast with the single caspase-3 in humans, zebrafish have two caspase-3 enzymes due to a whole-genome duplication [8], and the two caspase-3 enzymes exhibit differences in substrate selection. We showed previously that DrCasp-3a exhibits relaxed specificity, with approximately equal activity against DEVD and VEID [10]. Our data described here shows that DrCasp-3b is more similar to HsCasp-3, with preference for P4 aspartate. Even though DrCasp-3b has weak activity toward VEID, the activity is negligible when compared with that of DrCasp-3a since the high  $K_M$  value is close to the detection limit for the activity assay. We show that two sites, on active site loops L1 and L3, when combined with two sites near the S4 binding pocket, contribute to a hydrogen bonding network that stabilizes the P1 and P3 residues of the DxxD substrate by decreasing the mobility of a conserved arginine residue that interacts with the side-chains of both amino acids. Thus, in the caspase-3 conformational landscape, the selection of P4 aspartate *versus* P4 valine is due to the combination of hydrogen bonding in the S4 pocket coupled to the network of hydrogen bonds that stabilize CP-R161. Changing the hydrogen bonding

network of CP-R161 results in relaxed specificity in the case of DrCasp-3a. Given the constraints in the conformational landscape, it appears that multiple mutations are required to de-evolve the enzyme sufficiently in order to swap enzyme specificity. In contrast, changes in hydrogen bonding networks, within the same conformational landscape, are sufficient to improve activity against the second substrate, VEID, without significantly altering activity against the first substrate, DEVD. More generally, if cells do not require the separation of substrate selection, then fewer substitutions are required to evolve a dual function protease, as in caspase-3a, compared with a change of enzyme specificity, as in the cases of caspase-3 *versus* caspase-6.

### Data Availability

The crystal structure of DrCasp-3a(CP-N163T) has been deposited in the Protein Data Bank, [www.rcsb.org](http://www.rcsb.org) under PDB ID code: 7JL7.

### Competing Interests

The authors declare that there are no competing interests associated with this manuscript.

### Funding

This work was supported by the National Institutes of Health [grant number GM127654 (to A.C.C.)]; and the UT Arlington (Office of the Vice President for Research) (to A.C.C.).

### Author Contribution

L.Y., P.T.H., P.S. and A.C.C. were involved in the design of the study, interpretation of the data and writing and editing of the manuscript. L.Y. performed all experiments.

### Acknowledgements

Use of the Advanced Photon Source was supported by the U.S. Department of Energy, Office of Science, Office of Basic Energy Sciences, under contract number W-31-109-ENG-38.

### Abbreviations

Ac-DEVD-AFC, N-Acetyl-Asp-Glu-Val-Asp-7-amino-4-Trifluoromethylcoumarin; Ac-VEID-AFC, N-Acetyl-Val-Glu-Ile-Asp-7-amino-4-Trifluoromethylcoumarin; caspase, cysteinyl-aspartate specific protease; CP, common position; MD, molecular dynamics; NI-NTA, Nickel-nitrilotriacetic acid.

### References

- Galluzzi, L., Joza, N., Tasdemir, E., Maiuri, M.C., Hengartner, M., Abrams, J.M. et al. (2008) No death without life: vital functions of apoptotic effectors. *Cell Death Differ.* **15**, 1113–1123, <https://doi.org/10.1038/cdd.2008.28>
- Clark, A.C. (2016) Caspase allostery and conformational selection. *Chem. Rev.* **116**, 6666–6706, <https://doi.org/10.1021/acs.chemrev.5b00540>
- Hardy, J.A. and Wells, J.A. (2009) Dissecting an allosteric switch in caspase-7 using chemical and mutational probes. *J. Biol. Chem.* **284**, 26063–26069, <https://doi.org/10.1074/jbc.M109.001826>
- Talanian, R.V., Quinlan, C., Trautz, S., Hackett, M.C., Mankovich, J.A., Banach, D. et al. (1997) Substrate specificities of caspase family proteases. *J. Biol. Chem.* **272**, 9677–9682, <https://doi.org/10.1074/jbc.272.15.9677>
- Nicholson, D.W. and Thornberry, N.A. (1997) Caspases: killer proteases. *Trends Biochem. Sci.* **22**, 299–306, [https://doi.org/10.1016/S0968-0004\(97\)01085-2](https://doi.org/10.1016/S0968-0004(97)01085-2)
- Wei, Y., Fox, T., Chambers, S.P., Sintchak, J., Coll, J.T., Golec, J.M.C. et al. (2000) The structures of caspases-1, -3, -7 and -8 reveal the basis for substrate and inhibitor selectivity. *Chem. Biol.* **7**, 423–432, [https://doi.org/10.1016/S1074-5521\(00\)00123-X](https://doi.org/10.1016/S1074-5521(00)00123-X)
- Hardy, J.A. and Wells, J.A. (2004) Searching for new allosteric sites in enzymes. *Curr. Opin. Struct. Biol.* **14**, 706–715, <https://doi.org/10.1016/j.sbi.2004.10.009>
- Spead, O., Verreet, T., Donelson, C.J. and Poulain, F.E. (2018) Characterization of the caspase family in zebrafish. *PLoS ONE* **13.5**, e0197966, <https://doi.org/10.1371/journal.pone.0197966>
- LeBlanc, A., Liu, H., Goodyer, C., Bergeron, C. and Hammond, J. (1999) Caspase-6 role in apoptosis of human neurons, amyloidogenesis, and Alzheimer's disease. *J. Biol. Chem.* **274**, 23426–23436, <https://doi.org/10.1074/jbc.274.33.23426>
- Tucker, M.B., MacKenzie, S.H., Maciag, J.J., Dirscherl Ackerman, H., Swartz, P., Yoder, J.A. et al. (2016) Phage display and structural studies reveal plasticity in substrate specificity of caspase-3a from zebrafish. *Protein Sci.* **25**, 2076–2088, <https://doi.org/10.1002/pro.3032>
- Grinshpon, R.D. and Clark, A.C. (2019) Unravelling cancer signaling pathways: a multidisciplinary approach. Integr Evol theory into cancer Biol caspase signaling. In *Unravelling Cancer Signal Pathways: A Multidisciplinary Approach* (Bose, K. and Chaudhari, P., eds), pp. 131–155, Springer, Singapore

- 12 Grinshpon, R.D., Shrestha, S., Titus-McQuillan, J., Hamilton, P.T., Swartz, P.D. and Clark, A.C. (2019) Resurrection of ancestral effector caspases identifies novel networks for evolution of substrate specificity. *Biochem. J.* **476**, 3475–3492, <https://doi.org/10.1042/BCJ20190625>
- 13 Cade, C., Swartz, P., MacKenzie, S.H. and Clark, A.C. (2014) Modifying caspase-3 activity by altering allosteric networks. *Biochemistry* **53**, 7582–7595, <https://doi.org/10.1021/bi500874k>
- 14 Pop, C., Chen, Y.R., Smith, B., Bose, K., Bobay, B., Tripathy, A. et al. (2001) Removal of the pro-domain does not affect the conformation of the procaspase-3 dimer. *Biochemistry* **40**, 14224–14235, <https://doi.org/10.1021/bi011037e>
- 15 Bose, K. and Clark, A.C. (2001) Dimeric procaspase-3 unfolds via a four-state equilibrium process. *Biochemistry* **40**, 14236–14242, <https://doi.org/10.1021/bi0110387>
- 16 Grinshpon, R.D., Williford, A., Titus-McQuillan, J. and Clark, A. (2018) The CaspBase: a curated database for evolutionary biochemical studies of caspase functional divergence and ancestral sequence inference. *Protein Sci.* **27**, 1857–1870, <https://doi.org/10.1002/pro.3494>
- 17 Artimo, P., Jonnalagedda, M., Arnold, K., Baratin, D., Csardi, G., De Castro, E. et al. (2012) ExPASy: SIB bioinformatics resource portal. *Nucleic Acids Res.* **40**, 597–603, <https://doi.org/10.1093/nar/gks400>
- 18 Crooks, G., Hon, G., Chandonia, J. and Brenner, S. (2004) NCBI GenBank FTP Site \ nWebLogo: a sequence logo generator. *Genome Res.* **14**, 1188–1190, <ftp://ftp.ncbi.nih.gov/genomes/Bacteria>, <https://doi.org/10.1101/gr.849004>
- 19 Walters, J., Swartz, P., Mattos, C. and Clark, A.C. (2011) Thermodynamic, enzymatic and structural effects of removing a salt bridge at the base of loop 4 in (pro)caspase-3. *Arch. Biochem. Biophys.* **508**, 31–38, <https://doi.org/10.1016/j.abb.2011.01.011>
- 20 Thomas, M.E., Grinshpon, R., Swartz, P. and Clark, A.C. (2018) Modifications to a common phosphorylation network provide individualized control in caspases. *J. Biol. Chem.* **293**, 5447–5461, <https://doi.org/10.1074/jbc.RA117.000728>
- 21 Emsley, P., Lohkamp, B., Scott, W.G. and Cowtan, K. (2010) Features and development of Coot. *Acta Crystallogr. Sect. D Biol. Crystallogr.* **66**, 486–501, <https://doi.org/10.1107/S0907444910007493>
- 22 Chen, V.B., Arendall, W.B., Headd, J.J., Keedy, D.A., Immormino, R.M., Kapral, G.J. et al. (2010) MolProbity: all-atom structure validation for macromolecular crystallography. *Acta Crystallogr. Sect. D Biol. Crystallogr.* **66**, 12–21, <https://doi.org/10.1107/S0907444909042073>
- 23 Adams, P.D., Afonine, P.V., Bunkóczi, G., Chen, V.B., Davis, I.W., Echols, N. et al. (2010) PHENIX: a comprehensive Python-based system for macromolecular structure solution. *Acta Crystallogr. Sect. D Biol. Crystallogr.* **66**, 213–221, <https://doi.org/10.1107/S0907444909052925>
- 24 Abraham, M.J., Murtola, T., Schulz, R., Páll, S., Smith, J.C., Hess, B. et al. (2015) Gromacs: High performance molecular simulations through multi-level parallelism from laptops to supercomputers. *SoftwareX* **1–2**, 19–25, <https://doi.org/10.1016/j.softx.2015.06.001>
- 25 Berendsen, H.J.C., van der Spoel, D. and van Drunen, R. (1995) GROMACS: a message-passing parallel molecular dynamics implementation. *Comput. Phys. Commun.* **91**, 43–56, [https://doi.org/10.1016/0010-4655\(95\)00042-E](https://doi.org/10.1016/0010-4655(95)00042-E)
- 26 Chen, A.A. and Pappu, R.V. (2007) Parameters of monovalent ions in the AMBER-99 forcefield: assessment of inaccuracies and proposed improvements. *J. Phys. Chem. B* **111**, 11884–11887, <https://doi.org/10.1021/jp0765392>
- 27 Mark, P. and Nilsson, L. (2001) Structure and dynamics of the TIP3P, SPC, and SPC/E water models at 298 K. *J. Phys. Chem. A* **105**, 9954–9960, <https://doi.org/10.1021/jp003020w>
- 28 Walters, J., Schipper, J.L., Swartz, P., Mattos, C. and Clark, A.C. (2012) Allosteric modulation of caspase 3 through mutagenesis. *Biosci. Rep.* **32**, 401–411, <https://doi.org/10.1042/BSR20120037>
- 29 Maciag, J.J., Mackenzie, S.H., Tucker, M.B., Schipper, J.L., Swartz, P. and Clark, A.C. (2016) Tunable allosteric library of caspase-3 identifies coupling between conserved water molecules and conformational selection. *Proc. Natl. Acad. Sci. U.S.A.* **113**, E6080–E6088, <https://www.pnas.org/content/113/41/E6080>, <https://doi.org/10.1073/pnas.1603549113>
- 30 Vaidya, S. and Hardy, J.A. (2011) Caspase-6 latent state stability relies on helical propensity. *Biochemistry* **50**, 3282–3287, <https://doi.org/10.1021/bi2001664>
- 31 Celnikier, G., Nimrod, G., Ashkenazy, H., Glaser, F., Martz, E., Mayrose, I. et al. (2013) ConSurf: using evolutionary data to raise testable hypotheses about protein function. *Isr. J. Chem.* **53**, 199–206, <https://doi.org/10.1002/ijch.201200096>
- 32 Ashkenazy, H., Abadi, S., Martz, E., Chay, O., Mayrose, I., Pupko, T. et al. (2016) ConSurf 2016: an improved methodology to estimate and visualize evolutionary conservation in macromolecules. *Nucleic Acids Res.* **44**, W344–W350, <https://doi.org/10.1093/nar/gkw408>
- 33 Ashkenazy, H., Erez, E., Martz, E., Pupko, T. and Ben-Tal, N. (2010) ConSurf 2010: calculating evolutionary conservation in sequence and structure of proteins and nucleic acids. *Nucleic Acids Res.* **38**, 529–533, <https://doi.org/10.1093/nar/gkq399>
